# Supplementary material for: Attrition of T Cell Zone Fibroblastic Reticular Cell Number and Function in Aged Spleens
Source: PubMed Central journal article supplement — Immunohorizons. Author manuscript; Available in PMC 2019 Jan 29. (PMC6350919; doi:10.4049/immunohorizons.1700062), 2018-07-23
Supplement: NIHMS981173-supplement-supp_figs.pdf [file NIHMS981173-supplement-supp_figs.pdf]

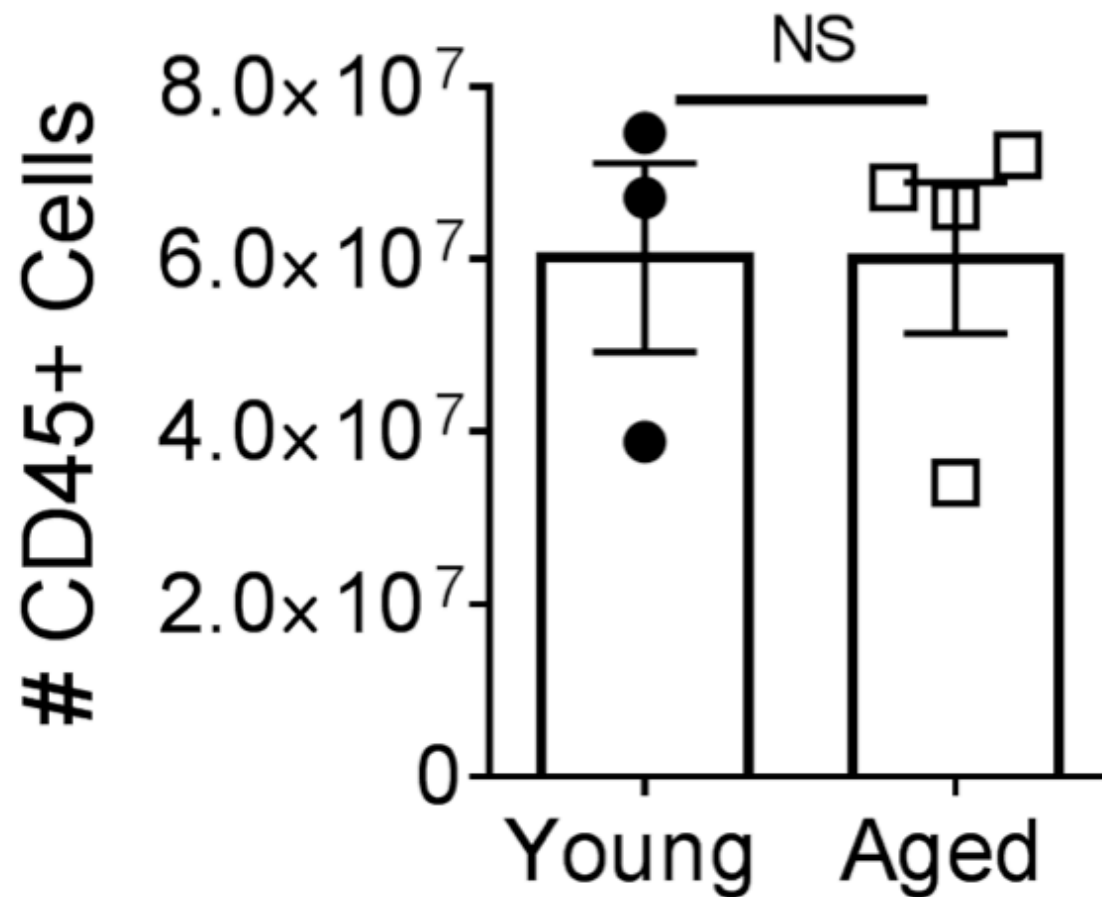

**Supplemental Figure 1. Preserved total immune cell numbers in aged naïve spleens.** Digested single cell suspensions from young and aged spleens were gated on alive, signal cells that are CD45+. Data are from one representative of three independent experiments. Data was analyzed for statistical significance using a two tailed T-test n=3-4 mice per group, error bars =+SEM.
